# Supplementary material for: MOF-derived ZnS/NC yolk–shell composites for highly reversible lithium storage
Source: Royal Society of Chemistry journal article supplement (doi:10.1039/d2nj01340a), 2022-01-01
Supplement: d2nj01340a1.pdf [file d2nj01340a1.pdf]

## Supporting Information

### **MOF-Derived ZnS/NC yolk-shell Composites for Highly Reversible Lithium Storage**

Ping Wang,<sup>a,b</sup> Yan Jiang,<sup>a,b</sup> Yuanyuan Cao,<sup>a,b</sup> Xiaojuan Wu,<sup>a,b</sup> and Xiang Liu\*<sup>a,b</sup>

<sup>a</sup> *Institute of Medicine & Chemical Engineering, Zhenjiang College, Zhenjiang 212028, P. R. China*

<sup>b</sup> *Zhenjiang Key Laboratory of Functional Chemistry, Institute of Chemistry & Materials Science, Zhenjiang College, Zhenjiang 212028, P.R. China*

Corresponding Authors E-mail: liuxiang0222@126.com (X. Liu)

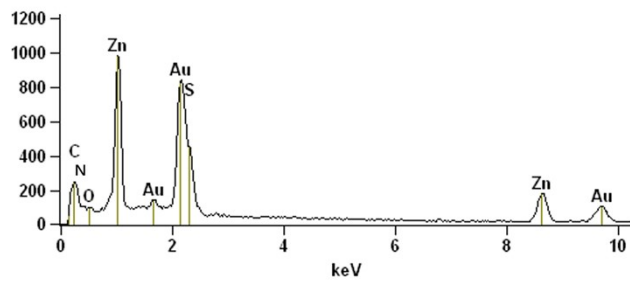

Fig. S1 EDS results of ZnS@NC.

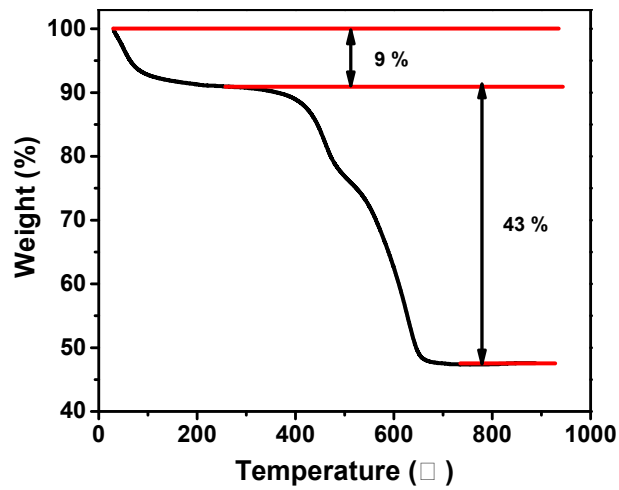

Fig. S2 TG curve of ZnS@NC.

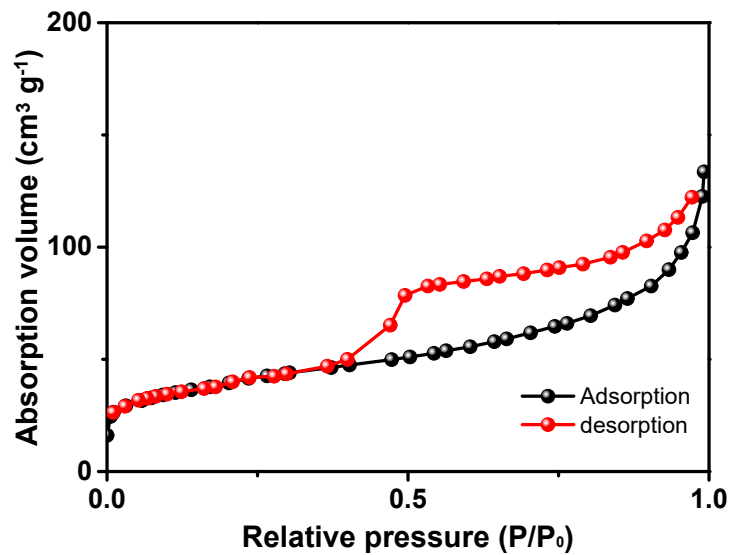

Fig. S3 N<sub>2</sub> adsorption-desorption isotherm (77K) of ZnS@NC.

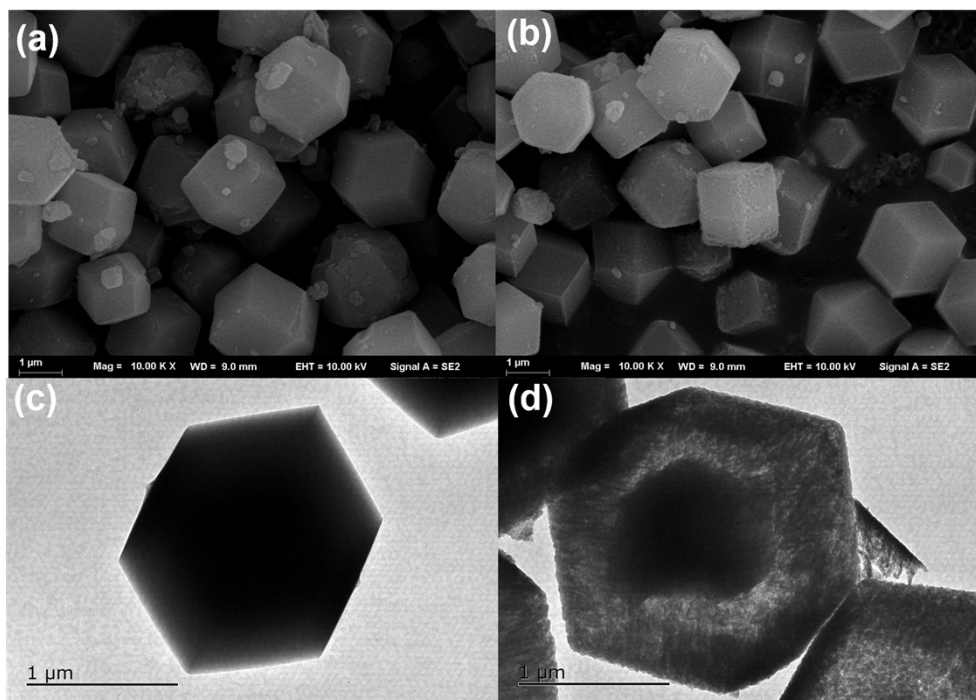

Fig. S4 SEM images of samples. (a) ZIF-8, (b) ZnS@ZIF-8. TEM images of samples. (c) ZIF-8, (d) ZnS@ZIF-8.

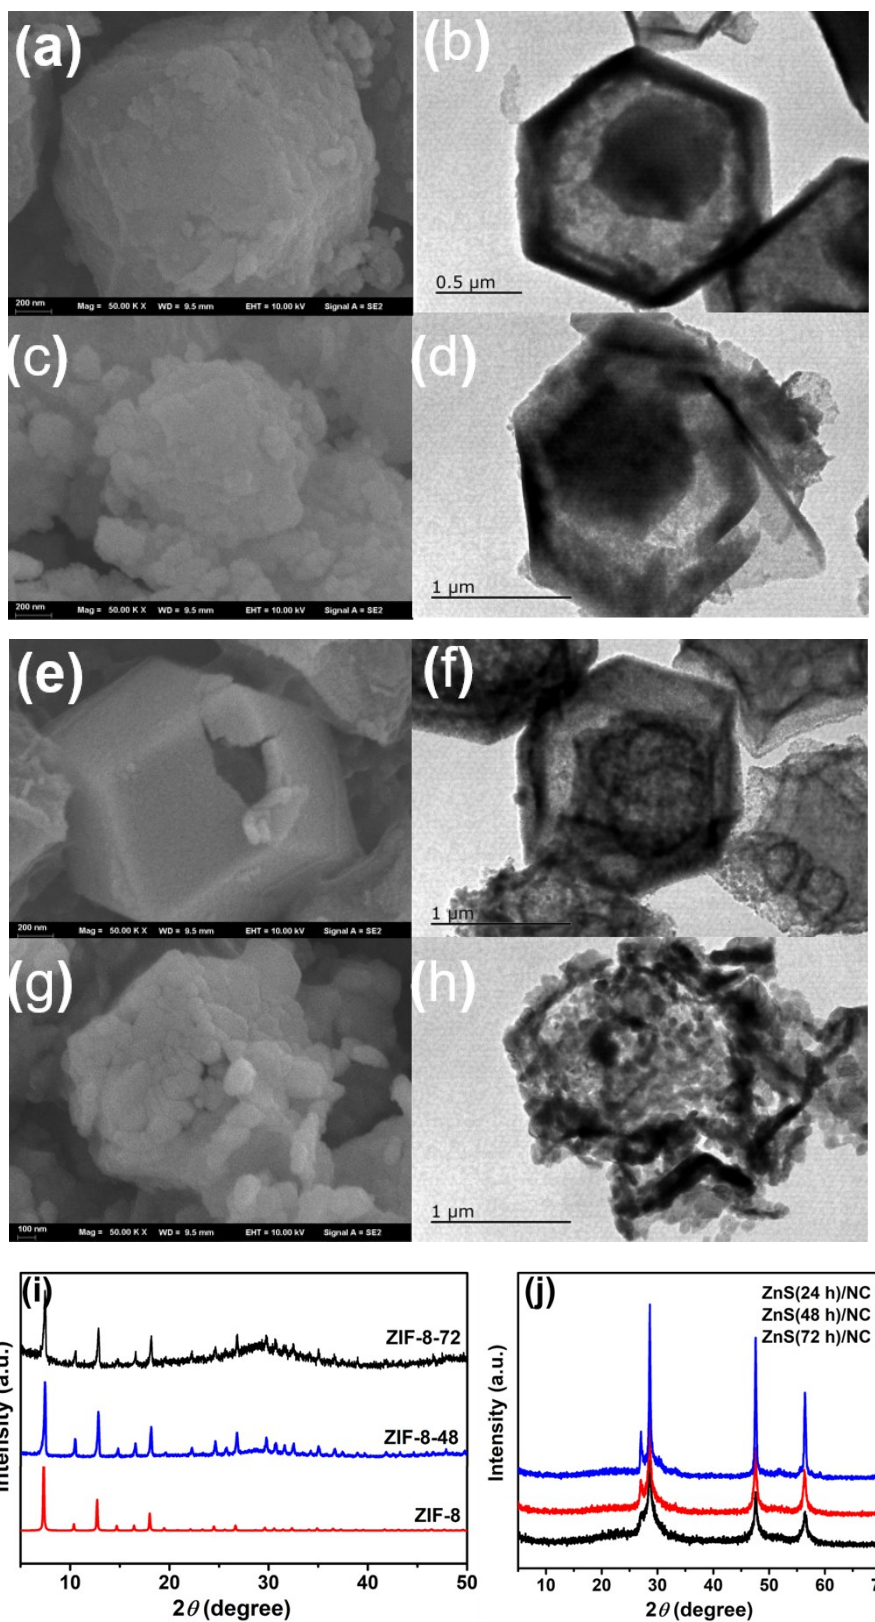

Fig. S5 SEM image of (a) ZnS(48 h)@ZIF-8, (c) ZnS(72 h)@ZIF-8, (e) ZnS(48 h)/NC, (g) ZnS(72 h)/NC.

TEM images of (b) ZnS(48 h)@ZIF-8, (d) ZnS(72 h)@ZIF-8, (f) ZnS(48 h)/NC, (h) ZnS(72 h)/NC.

XRD patterns of (i) ZnS(48 h)@ZIF-8, ZnS(72 h)@ZIF-8 and ZIF8. (j) ZnS(48 h)/NC, ZnS(72 h)/NC and ZnS(24 h)/NC.

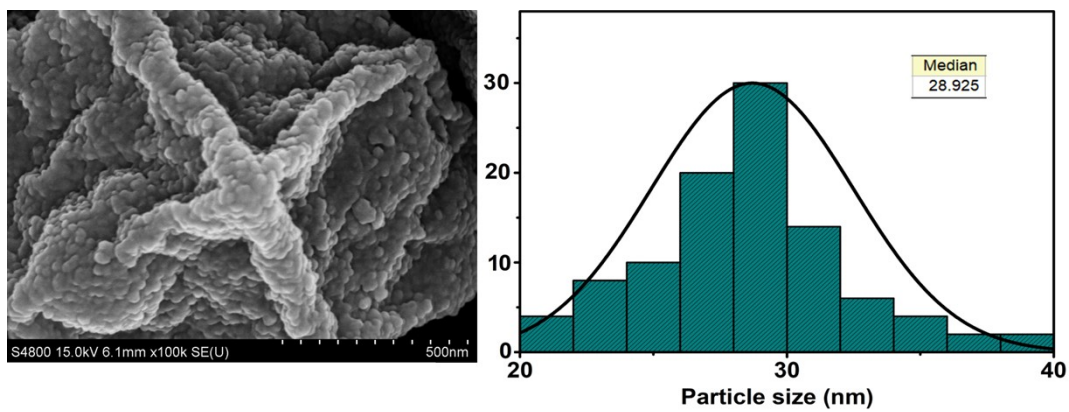

Fig. S6 The size distribution diagram of ZnS particles

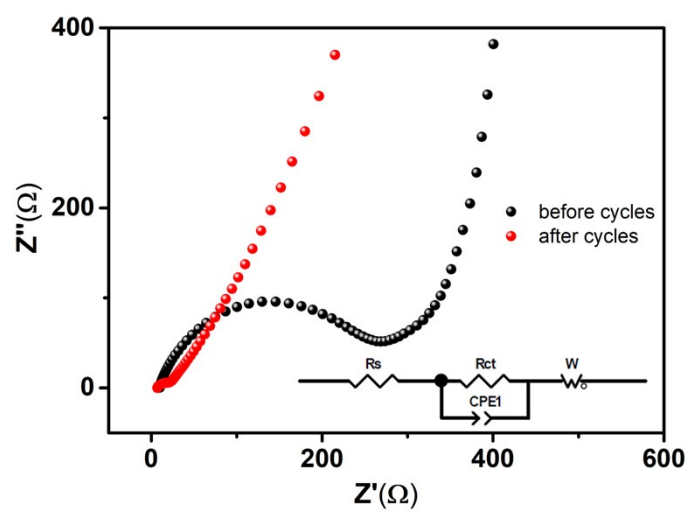

Fig. S7 Impedance spectrum of ZnS/NC
